# Supplementary material for: A systematic approach to decipher crosstalk in the p53 signaling pathway using single cell dynamics
Source: PLOS journal article supplement (doi:10.1371/journal.pcbi.1007901), 2020-06-26

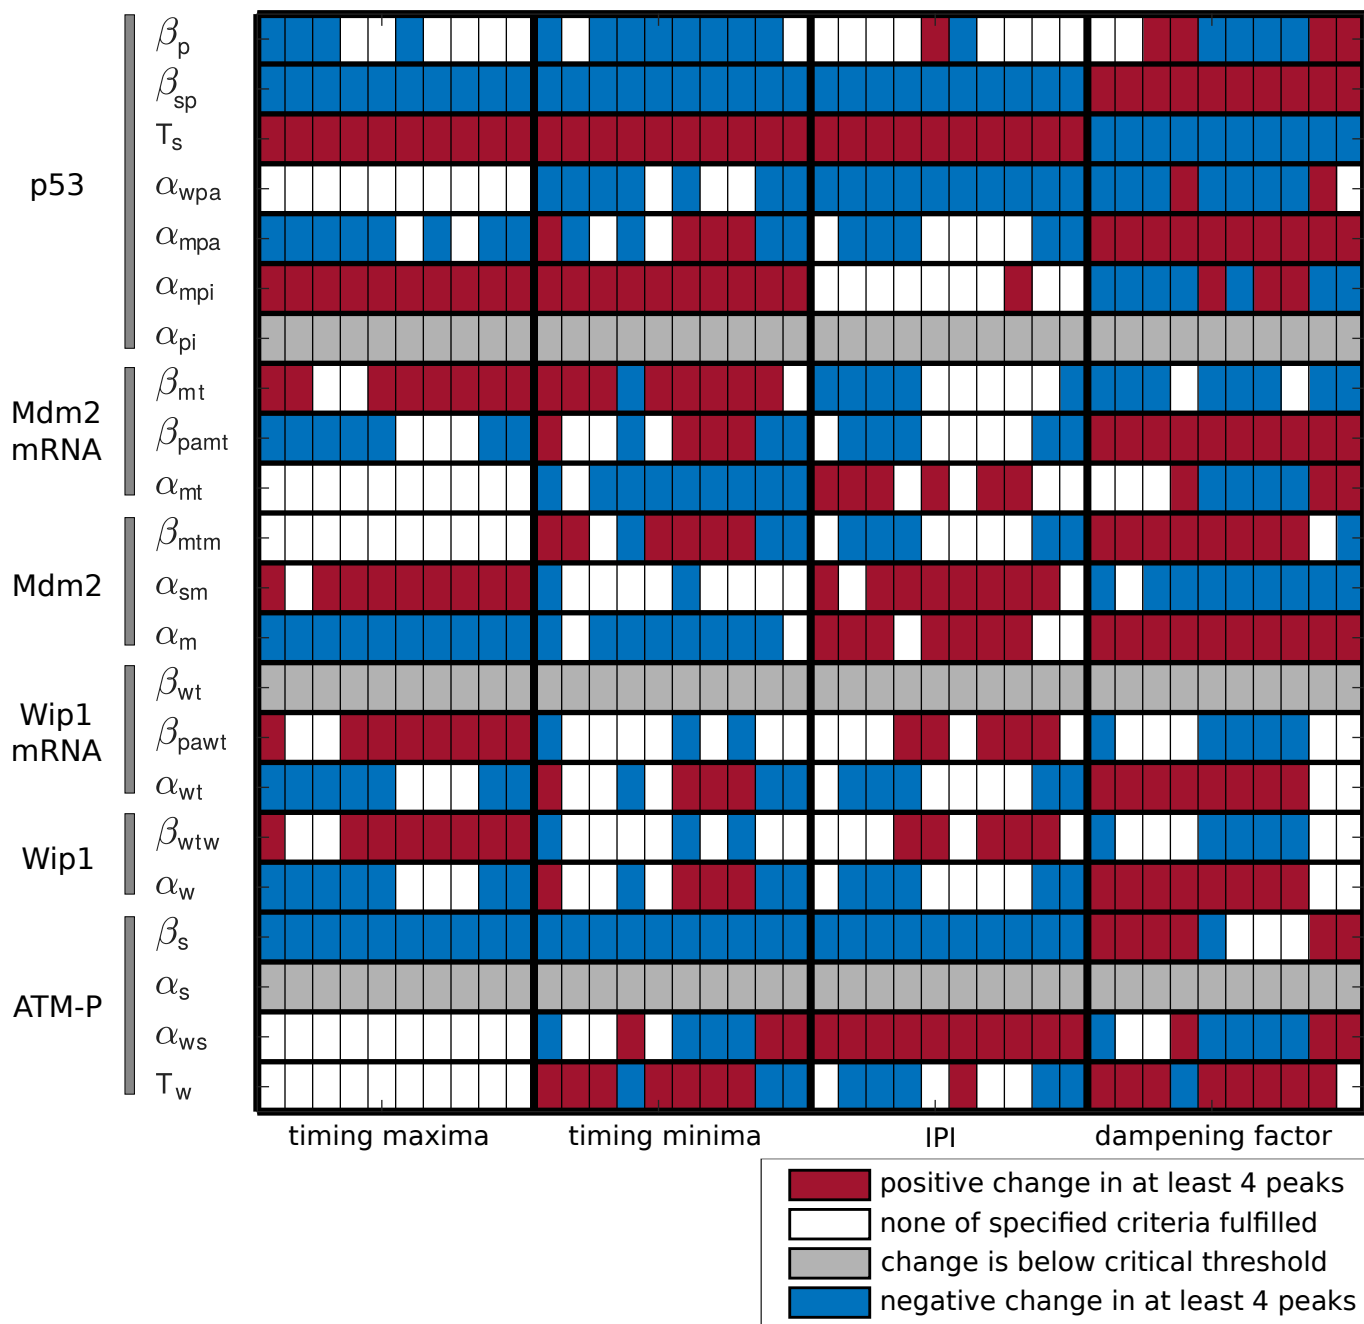

Supplement: S5 (10.1371/journal.pcbi.1007901.s005) [file journal.pcbi.1007901.s005]
